# Supplementary material
Source: PubMed Central journal article supplement (PMC6145724)
Supplement: jamaoncol-4-930-s001.pdf [file jamaoncol-4-930-s001.pdf]

## Supplementary Online Content

Dossa F, Acuna SA, Rickles AS, et al. Association between adjuvant chemotherapy and overall survival in patients with rectal cancer and pathological complete response after neoadjuvant chemotherapy and resection. *JAMA Oncol*. Published online April 19, 2018. doi:10.1001/jamaoncol.2017.5597

**eTable 1.** Codes Used for Cohort Development

**eTable 2.** Baseline Characteristics Before and After Propensity Score Matching

**eTable 3.** Sensitivity Analysis Evaluating the Sensitivity of Study Results to the Presence of Unmeasured Confounding

**eFigure.** Histograms Demonstrating the Distribution of Propensity Scores Among Nonadjuvant (upper panes) and Adjuvant (lower panes) Treated Patients

This supplementary material has been provided by the authors to give readers additional information about their work.

**eTable 1.** Codes Used for Cohort Development

| ICD-O-3 Morphologic Codes |                                                                                                                                                                      |
|---------------------------|----------------------------------------------------------------------------------------------------------------------------------------------------------------------|
| 8140                      | Adenocarcinoma, NOS                                                                                                                                                  |
| 8144                      | Adenocarcinoma, intestinal type                                                                                                                                      |
| 8210                      | Adenocarcinoma in adenomatous polyp                                                                                                                                  |
| 8211                      | Tubular adenocarcinoma                                                                                                                                               |
| 8213                      | Serrated adenocarcinoma                                                                                                                                              |
| 8221                      | Adenocarcinoma in multiple adenomatous polyps                                                                                                                        |
| 8261                      | Adenocarcinoma in villous adenoma                                                                                                                                    |
| 8262                      | Villous adenocarcinoma                                                                                                                                               |
| 8263                      | Adenocarcinoma in tubulovillous adenoma                                                                                                                              |
| Resectional surgery codes |                                                                                                                                                                      |
| 30                        | Wedge or segmental resection, partial proctectomy, NOS<br>Includes: anterior resection, Hartmann's operation, low anterior resection, transsacral rectosigmoidectomy |
| 40                        | Pull through with sphincter preservation (coloanal anastomosis)                                                                                                      |
| 50                        | Total proctectomy<br>Includes: abdominoperineal resection                                                                                                            |
| 60                        | Total proctocolectomy, NOS                                                                                                                                           |
| 70                        | Proctectomy or proctocolectomy with resection in continuity with other organs; pelvic exenteration                                                                   |
| 80                        | Proctectomy, NOS                                                                                                                                                     |

**eTable 2.** Baseline Characteristics Before and After Propensity Score Matching

| Characteristic                 | Before matching                    |                               |                          | After matching                   |                               |                          |
|--------------------------------|------------------------------------|-------------------------------|--------------------------|----------------------------------|-------------------------------|--------------------------|
|                                | No Adjuvant Treatment<br>n = 1,775 | Adjuvant Treatment<br>n = 680 | Standardized Differences | No Adjuvant Treatment<br>n = 667 | Adjuvant Treatment<br>n = 667 | Standardized Differences |
| <i>Patient Characteristics</i> |                                    |                               |                          |                                  |                               |                          |
| Age, median years (IQR)        | 61 (52-70)                         | 57 (49-65)                    | -0.34                    | 56 (49-65)                       | 57 (49-65)                    | 0.006                    |
| Sex, n (%)                     |                                    |                               | 0.11                     |                                  |                               | -0.03                    |
| Male                           | 1,088 (61.3)                       | 381 (56.0)                    |                          | 370 (55.5)                       | 379 (56.8)                    |                          |
| Female                         | 687 (38.7)                         | 299 (44.0)                    |                          | 297 (44.5)                       | 288 (43.2)                    |                          |
| Race, n (%)                    |                                    |                               | 0.06                     |                                  |                               | 0.04                     |
| White                          | 1,546 (87.1)                       | 597 (87.8)                    |                          | 591 (88.6)                       | 585 (87.7)                    |                          |
| Black                          | 129 (7.3)                          | 40 (5.9)                      |                          | 39 (5.9)                         | 40 (6.0)                      |                          |
| Other                          | 91 (5.1)                           | 40 (5.9)                      |                          | 35 (5.3)                         | 39 (5.9)                      |                          |
| Ethnicity, n (%)               |                                    |                               | 0.05                     |                                  |                               | 0.02                     |
| Not Hispanic                   | 1,592 (89.7)                       | 610 (89.7)                    |                          | 598 (89.7)                       | 599 (89.8)                    |                          |
| Hispanic                       | 100 (5.6)                          | 33 (4.9)                      |                          | 36 (5.4)                         | 33 (5.0)                      |                          |
| Insurance status, n (%)        |                                    |                               | 0.27                     |                                  |                               | 0.06                     |
| Uninsured                      | 59 (3.3)                           | 21 (3.1)                      |                          | 23 (3.5)                         | 21 (3.2)                      |                          |
| Private                        | 911 (51.3)                         | 433 (63.7)                    |                          | 421 (63.1)                       | 422 (63.3)                    |                          |
| Medicaid                       | 97 (5.5)                           | 35 (5.2)                      |                          | 38 (5.7)                         | 35 (5.3)                      |                          |
| Medicare                       | 666 (37.5)                         | 176 (25.9)                    |                          | 173 (25.9)                       | 174 (26.1)                    |                          |
| Area of residence, n (%)       |                                    |                               | 0.14                     |                                  |                               | 0.08                     |
| Not metropolitan               | 307 (17.3)                         | 131 (19.3)                    |                          | 137 (20.5)                       | 131 (19.6)                    |                          |
| Metropolitan                   | 1,417 (79.8)                       | 542 (79.7)                    |                          | 530 (79.5)                       | 534 (80.1)                    |                          |
| Median Income, n               |                                    |                               | 0.07                     |                                  |                               | 0.02                     |

|                                                               |                 |               |      |               |               |      |
|---------------------------------------------------------------|-----------------|---------------|------|---------------|---------------|------|
| (%)                                                           |                 |               |      |               |               |      |
| <\$38,000                                                     | 283<br>(15.9)   | 107<br>(15.7) |      | 106<br>(15.9) | 107<br>(16.0) |      |
| \$38,000-<br>\$47,999                                         | 403<br>(22.7)   | 138<br>(20.3) |      | 140<br>(20.1) | 137<br>(20.5) |      |
| \$48,000 –<br>\$62,999                                        | 476<br>(26.8)   | 188<br>(27.7) |      | 186<br>(27.9) | 184<br>(27.6) |      |
| \$63,000+                                                     | 594<br>(33.5)   | 242<br>(35.6) |      | 235<br>(35.2) | 239<br>(35.8) |      |
| No high<br>school<br>education <sup>†</sup> , <i>n</i><br>(%) |                 |               | 0.13 |               |               | 0.05 |
| >21%                                                          | 277<br>(15.6)   | 92 (13.5)     |      | 101<br>(15.1) | 92 (13.8)     |      |
| 13-20.9%                                                      | 454<br>(25.6)   | 158<br>(23.2) |      | 160<br>(24.0) | 157<br>(23.5) |      |
| 7-12.9%                                                       | 584<br>(32.9)   | 219<br>(32.2) |      | 217<br>(32.5) | 217<br>(32.5) |      |
| <7%                                                           | 442<br>(24.9)   | 206<br>(30.3) |      | 189<br>(28.3) | 201<br>(30.1) |      |
| Charlson-<br>Deyo<br>Comorbidity<br>Score, <i>n</i> (%)       |                 |               | 0.09 |               |               | 0.02 |
| 0                                                             | 1,401<br>(78.9) | 560<br>(82.4) |      | 544<br>(81.6) | 547<br>(82.0) |      |
| 1                                                             | 303<br>(17.1)   | 100<br>(14.7) |      | 101<br>(15.1) | 100<br>(15.0) |      |
| ≥2                                                            | 71 (4.0)        | 20 (2.9)      |      | 22 (3.3)      | 20 (3.0)      |      |
| <i>Facility<br/>Characteristics</i>                           |                 |               |      |               |               |      |
| Facility<br>type, <i>n</i> (%)                                |                 |               | 0.07 |               |               | 0.02 |
| Community<br>cancer<br>program                                | 892<br>(50.3)   | 318<br>(46.8) |      | 316<br>(47.4) | 314<br>(47.1) |      |
| Not<br>community<br>cancer<br>program                         | 794<br>(44.7)   | 322<br>(47.4) |      | 309<br>(46.3) | 314<br>(47.1) |      |
| Distance to<br>facility,                                      | 12.1<br>(5.5-   | 13.6<br>(6.2- | 0.03 | 13.0<br>(5.9- | 13.7<br>(6.2- | 0.01 |

|                                |              |            |      |            |            |      |
|--------------------------------|--------------|------------|------|------------|------------|------|
| <i>miles, median (IQR)</i>     | 29.8)        | 34.6)      |      | 31.6)      | 34.6)      |      |
| <i>Tumor Characteristics</i>   |              |            |      |            |            |      |
| Grade, <i>n (%)</i>            |              |            | 0.12 |            |            | 0.05 |
| Well differentiated            | 119 (6.7)    | 32 (4.7)   |      | 30 (4.5)   | 32 (4.8)   |      |
| Moderately differentiated      | 1,064 (60.0) | 439 (64.6) |      | 419 (62.8) | 430 (64.5) |      |
| Poorly differentiated          | 107 (6.0)    | 45 (6.6)   |      | 41 (6.2)   | 43 (6.4)   |      |
| Missing                        | 485 (27.3)   | 164 (24.1) |      | 177 (26.5) | 162 (24.3) |      |
| Tumor size, <i>cm, n(%)</i>    |              |            | 0.23 |            |            | 0.05 |
| <2                             | 78 (4.4)     | 23 (3.4)   |      | 26 (3.9)   | 23 (3.5)   |      |
| 2-4                            | 367 (20.7)   | 177 (26.0) |      | 169 (25.3) | 170 (25.5) |      |
| 4-6                            | 363 (20.5)   | 176 (25.9) |      | 174 (26.1) | 172 (25.8) |      |
| >6                             | 256 (14.4)   | 93 (13.7)  |      | 101 (15.1) | 93 (13.9)  |      |
| Missing                        | 711 (40.0)   | 211 (31.0) |      | 197 (29.5) | 209 (31.3) |      |
| Clinical T stage, <i>n (%)</i> |              |            | 0.17 |            |            | 0.02 |
| 1/2                            | 199 (11.2)   | 62 (9.1)   |      | 59 (8.9)   | 60 (9.0)   |      |
| 3/4                            | 1,462 (82.4) | 596 (87.7) |      | 584 (87.6) | 585 (87.7) |      |
| Clinical N stage, <i>n (%)</i> |              |            | 0.25 |            |            | 0.02 |
| 0                              | 985 (55.5)   | 321 (47.2) |      | 319 (47.8) | 319 (47.8) |      |
| 1                              | 647 (36.5)   | 319 (46.9) |      | 311 (46.6) | 309 (46.3) |      |
| 2                              | 59 (3.3)     | 26 (3.8)   |      | 25 (3.8)   | 25 (3.8)   |      |
| Missing                        | 84 (4.7)     | 14 (2.1)   |      | 12 (1.8)   | 14 (2.1)   |      |

|                                                     |            |            |      |            |            |       |
|-----------------------------------------------------|------------|------------|------|------------|------------|-------|
| <i>Treatment Characteristics</i>                    |            |            |      |            |            |       |
| Radiation dose, <i>n</i> (%)                        |            |            | 0.15 |            |            | 0.08  |
| 4500                                                | 233 (13.1) | 78 (11.5)  |      | 63 (9.5)   | 77 (11.5)  |       |
| 5040                                                | 919 (51.8) | 399 (58.7) |      | 401 (60.1) | 389 (58.3) |       |
| 5400                                                | 131 (7.4)  | 45 (6.6)   |      | 41 (6.2)   | 45 (6.8)   |       |
| Other                                               | 260 (14.7) | 92 (13.5)  |      | 94 (14.1)  | 91 (13.6)  |       |
| Missing                                             | 232 (13.1) | 66 (9.7)   |      | 68 (10.2)  | 65 (9.8)   |       |
| Time from end of radiation to surgery, <i>n</i> (%) |            |            | 0.25 |            |            | 0.09  |
| <5 weeks                                            | 103 (5.8)  | 45 (6.6)   |      | 36 (5.4)   | 45 (6.8)   |       |
| 5-7 weeks                                           | 460 (25.9) | 200 (29.4) |      | 207 (31.0) | 197 (29.5) |       |
| 7-9 weeks                                           | 511 (28.8) | 233 (34.3) |      | 214 (32.1) | 228 (34.2) |       |
| 9-12 weeks                                          | 386 (21.8) | 131 (19.3) |      | 143 (21.4) | 129 (19.3) |       |
| >12 weeks                                           | 200 (11.3) | 37 (5.4)   |      | 36 (5.4)   | 36 (5.4)   |       |
| Number of nodes examined, <i>n</i> (%)              |            |            | 0.16 |            |            | 0.03  |
| <6                                                  | 386 (21.8) | 109 (16.0) |      | 105 (15.7) | 108 (16.2) |       |
| 6-11                                                | 469 (26.4) | 176 (25.9) |      | 164 (24.6) | 172 (25.8) |       |
| ≥12                                                 | 905 (50.7) | 387 (56.9) |      | 391 (58.6) | 380 (57.0) |       |
| Length of stay, median days ( <i>IQR</i> )          | 6 (5-8)    | 6 (4-7)    | 0.04 | 6 (4-8)    | 6 (4-7)    | -0.08 |
| 30d unplanned readmission, <i>n</i> (%)             |            |            | 0.09 |            |            | 0.06  |
| Yes                                                 | 108 (6.1)  | 57 (8.4)   |      | 52 (7.8)   | 57 (8.5)   |       |

|    |                |               |  |               |               |  |
|----|----------------|---------------|--|---------------|---------------|--|
| No | 1605<br>(90.4) | 602<br>(88.5) |  | 600<br>(90.0) | 590<br>(88.5) |  |
|    |                |               |  |               |               |  |

† Represents percentage of adults within the patient's area of residence (based on zip code) that did not complete high school education

**eTable 3.** Sensitivity Analysis Evaluating the Sensitivity of Study Results to the Presence of Unmeasured Confounding

Estimates for the proportions of patients in each group with poor performance status and hazard ratio for the association between poor performance status and mortality were derived from the literature:

| Estimate                                                                                     | Reference                         |
|----------------------------------------------------------------------------------------------|-----------------------------------|
| Proportion of colorectal cancer patients who underwent surgery and exhibited ECOG $\geq 2$   |                                   |
| 6%                                                                                           | Mathoulin-Pelissier et al. (2012) |
| 11.5%                                                                                        | Dobbins et al. (2015)             |
| Proportion of colorectal cancer patients with ECOG $\geq 2$ who received chemotherapy        |                                   |
| 2.5-3.6%                                                                                     | Kabbinavar et al. (2005)          |
| 4.7-5.6%                                                                                     | Grothey et al. (2008)             |
| 4.2-7.8%                                                                                     | Giantonio et al. (2007)           |
| Proportion of colorectal cancer patients with ECOG $\geq 2$ who did not receive chemotherapy |                                   |
| 10.3%                                                                                        | Grothey et al. (2008)             |
| Hazard ratio for association between ECOG $\geq 2$ (vs. 0) and mortality (95% CI)            |                                   |
| 1.60 (1.21-2.12)                                                                             | Grothey et al. (2008)*            |
| 4.14 (1.56-10.95)                                                                            | Ugolini et al. (2015)**           |

\* Based on multivariable Cox model

\*\* Based on univariable Cox model (study of patients >70 years old)

| <b>Patients with poor performance status in the control group (%)</b> | <b>Patients with poor performance status in the treated group (%)</b> | <b>Hazard ratio for the association between poor performance status and mortality</b> | <b>Adjusted hazard ratio (95% confidence interval) for the association between adjuvant chemotherapy and mortality</b> |
|-----------------------------------------------------------------------|-----------------------------------------------------------------------|---------------------------------------------------------------------------------------|------------------------------------------------------------------------------------------------------------------------|
| 0                                                                     | 0                                                                     | 0                                                                                     | 0.44 (0.28-0.70)                                                                                                       |
| 10                                                                    | 2.5                                                                   | 2.0                                                                                   | 0.51 (0.35-0.77)                                                                                                       |
| 10                                                                    | 2.5                                                                   | 4.0                                                                                   | 0.63 (0.47-0.89)                                                                                                       |
| 10                                                                    | 2.5                                                                   | 6.0                                                                                   | 0.73 (0.57-0.99)                                                                                                       |
| 15                                                                    | 2.5                                                                   | 2.0                                                                                   | 0.55 (0.40-0.82)                                                                                                       |
| 15                                                                    | 2.5                                                                   | 4.0                                                                                   | 0.74 (0.58-1.00)                                                                                                       |
| 10                                                                    | 5                                                                     | 2.0                                                                                   | 0.49 (0.33-0.75)                                                                                                       |
| 10                                                                    | 5                                                                     | 4.0                                                                                   | 0.56 (0.40-0.82)                                                                                                       |
| 10                                                                    | 5                                                                     | 6.0                                                                                   | 0.62 (0.46-0.88)                                                                                                       |
| 10                                                                    | 5                                                                     | 8.0                                                                                   | 0.67 (0.51-0.93)                                                                                                       |
| 10                                                                    | 5                                                                     | 10.0                                                                                  | 0.71 (0.55-0.97)                                                                                                       |
| 10                                                                    | 5                                                                     | 12.0                                                                                  | 0.74 (0.58-1.00)                                                                                                       |
| 15                                                                    | 5                                                                     | 3.5                                                                                   | 0.64 (0.48-0.90)                                                                                                       |
| 15                                                                    | 5                                                                     | 4.0                                                                                   | 0.67 (0.51-0.93)                                                                                                       |
| 15                                                                    | 5                                                                     | 4.5                                                                                   | 0.70 (0.54-0.96)                                                                                                       |



|    |   |     |                  |
|----|---|-----|------------------|
| 15 | 5 | 5.0 | 0.73 (0.57-0.99) |
| 15 | 5 | 5.5 | 0.75 (0.59-1.01) |

In this analysis, poor performance status was considered to be an unmeasured confounder that was more prevalent among the control group than the treated group and independently associated with overall survival. The proportions of patients with poor performance status in the control and treatment groups was varied, as was the hazard ratio for the association between poor performance status and mortality. Adjusted hazard ratios for the association between adjuvant chemotherapy and mortality were then calculated based on these values.

**eFigure.** Histograms Demonstrating the Distribution of Propensity Scores Among NonAdjuvant (upper panes) and Adjuvant (lower panes) Treated Patients

**A. Prior to propensity score matching**

a)

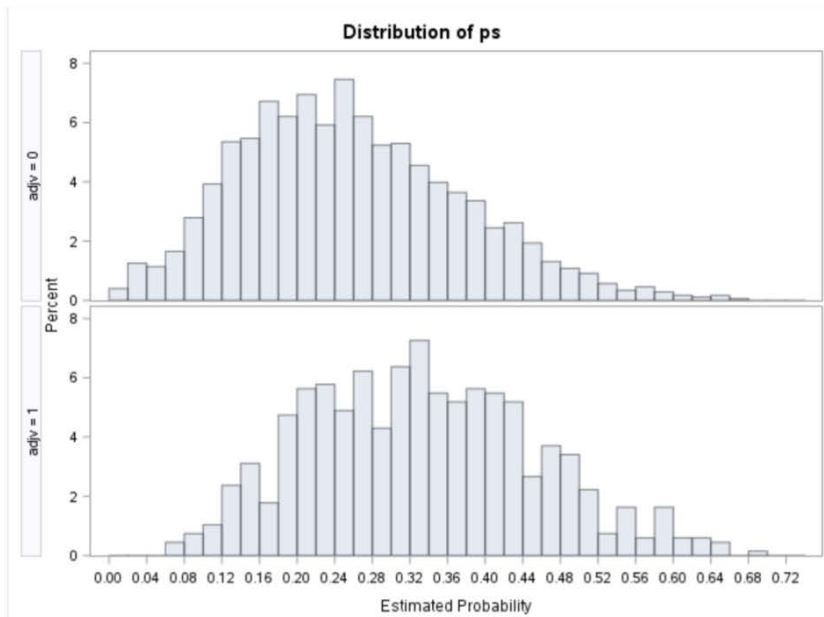

**B. After propensity score matching**

b)

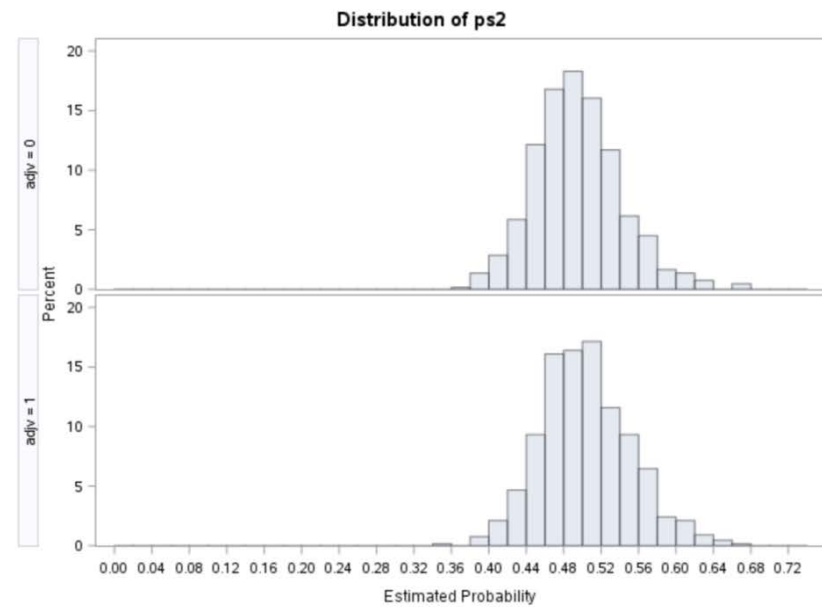

Following propensity score matching, the distribution of propensity scores was similar between adjuvant and non-adjuvant treated patients, suggesting balance of covariates included in the propensity score model.
